# Supplementary material
Source: publisher site journal article supplement (https://www.spandidos-publications.com/3101/downloadSupplementary)
Supplement: Supplementary file 1 [file downloadSupplementary]

## Sheet: Sheet1
Table SII. A complete list of the DMS between OA and normal knee articular cartilage from the dataset GSE63695.
	N_to_O.logFC	N_to_O.adj.P.Val	N_to_O.gene	N_to_O.feature	N_to_O.cgi
cg09352518	0.236529	0.0485431	ZNF714	5'UTR	island
cg14359798	0.219753	0.00467778		IGR	shelf
cg25693317	0.206549	0.0182332	SH3PXD2B	Body	opensea
cg22854448	0.182963	0.00467778	SPRED2	Body	opensea
cg20149022	0.182627	0.0096107	ARHGEF10	Body	opensea
cg09837648	0.17938	0.010859	PLXNB1	5'UTR	shelf
cg26282731	0.177415	0.0320922	ARHGAP10	Body	opensea
cg14834653	0.177146	0.0297335	FGFR2	TSS200	shelf
cg16409259	0.177102	0.0122361	LRP5	Body	shore
cg21311834	0.175099	0.0253871	FGFR3	3'UTR	shelf
cg03163812	0.174896	0.0436844	RNF5P1	TSS1500	opensea
cg19480965	0.172469	0.0408412		IGR	opensea
cg16426034	0.172117	0.0408412		IGR	opensea
cg22615203	0.171704	0.0282015		IGR	shore
cg12559925	0.171303	0.0163002	SH3BP4	5'UTR	shore
cg14196395	0.169772	0.0390912	DYSF	Body	opensea
cg19975346	0.169326	0.0215606	FAM53B	Body	opensea
cg15412772	0.168489	0.0164178	MED24	3'UTR	opensea
cg18314765	0.167893	0.0189045	TNP1	1stExon	opensea
cg20951255	0.167455	0.00326344		IGR	opensea
cg23856536	0.165394	0.0206528		IGR	shelf
cg08010619	0.164618	0.0277139	SWAP70	Body	opensea
cg24882324	0.164114	0.00467778	TNXB	Body	island
cg03705571	0.16394	0.0202403	ARHGEF10	Body	opensea
cg15265085	0.163502	0.00804772	TNXB	Body	island
cg04658679	0.16337	0.0330845		IGR	opensea
cg24692595	0.162673	0.010347		IGR	opensea
cg27205902	0.160287	0.0167586	AP2A2	Body	shore
cg20494738	0.158987	0.0117249	NCOR2	5'UTR	opensea
cg23340777	0.158191	0.0242576		IGR	shore
cg21442881	0.156587	0.00745037	DENND3	Body	opensea
cg19447962	0.154515	0.0383972	RAI1	5'UTR	shore
cg17242362	0.154264	0.00407521	ATXN7L1	Body	opensea
cg01789499	0.154141	0.0493719	PRDM8	5'UTR	island
cg16922523	0.154041	0.0423516	CADM1	Body	opensea
cg05768047	0.153756	0.0249988	AP2A2	Body	shore
cg19484481	0.152961	0.0442803	FOXO3	Body	opensea
cg03556669	0.152724	0.00374715	TNXB	Body	island
cg06205574	0.152319	0.0342183	SOX5	Body	opensea
cg13345122	0.15209	0.049103	STK39	Body	opensea
cg13971030	0.152062	0.0376647	SLC1A2	Body	opensea
cg23874437	0.151446	0.00706468	SPRED3	Body	island
cg12694372	0.151428	0.0295493	TNXB	Body	island
cg05522011	0.150684	0.0245048	PRDM8	Body	shore
cg12688965	0.150045	0.0482835	ZC3H3	Body	opensea
cg05380759	0.149255	0.0352115	LARS2	Body	opensea
cg07397612	0.149237	0.0422984	TBC1D22A	Body	shore
cg13168187	0.147703	0.0272809	PKP4	Body	opensea
cg20602300	0.147421	0.0377396	C15orf57	3'UTR	opensea
cg26525772	0.146988	0.0394641	GALNT2	Body	opensea
cg09486407	0.146678	0.0287695	ANKRD11	5'UTR	opensea
cg02732915	0.145267	0.0200629	PRDM8	5'UTR	shore
cg08550517	0.145129	0.0358962		IGR	opensea
cg18558476	0.145025	0.0237776		IGR	opensea
cg18421360	0.144562	0.0309726	GPR98	Body	opensea
cg25301103	0.144341	0.0145903	DIP2C	Body	shore
cg03311556	0.143385	0.00670272	PRDM8	5'UTR	shore
cg03534504	0.143117	0.0408412	STK10	Body	opensea
cg17235897	0.142256	0.000931086	FGFR2	Body	opensea
cg16767221	0.14216	0.047542	CGNL1	Body	opensea
cg22438810	0.141316	0.043692	LCN2	1stExon	opensea
cg23240477	0.140197	0.0383416	NFATC1	Body	shore
cg01093854	0.140084	0.0464851	TET1	Body	opensea
cg15196197	0.139529	0.0325719	TNXB	Body	island
cg14445366	0.139375	0.0189045		IGR	island
cg20101110	0.13898	0.0352441		IGR	shore
cg14953730	0.138376	0.00840905	INPP5A	Body	opensea
cg22902505	0.138373	0.0211667	PRDM8	5'UTR	shore
cg09597638	0.137045	0.039588		IGR	shore
cg06659338	0.136811	0.0484939	C1orf83	Body	opensea
cg07502661	0.13661	0.0330845		IGR	shore
cg11546777	0.136012	0.0331008	PLXDC2	Body	opensea
cg20269729	0.13598	0.0408412	COL11A2	Body	opensea
cg21470704	0.135606	0.0189045		IGR	shelf
cg17125990	0.135289	0.00626504		IGR	shore
cg00525277	0.135262	0.0269343	TNXB	Body	island
cg10880006	0.135249	0.0251551	PRDM8	Body	shore
cg01708636	0.135116	0.0434668	CPE	Body	shore
cg06002476	0.134208	0.0275096		IGR	opensea
cg05452645	0.134143	0.0148631	PRDM8	TSS1500	shore
cg27151122	0.134136	0.0471786		IGR	shelf
cg00502575	0.133902	0.0274436	RASA3	Body	shelf
cg04395788	0.133843	0.0242463	EXT1	Body	opensea
cg08037719	0.13376	0.0240612		IGR	shore
cg23537932	0.133663	0.00861357	GRK5	Body	opensea
cg23882945	0.133608	0.0101143	ALPK1	Body	island
cg17112975	0.133558	0.049103	44083	Body	opensea
cg12026858	0.133403	0.0474662	ZBTB16	Body	shelf
cg02973883	0.133275	0.0387424	DCAF4	TSS1500	shore
cg16698674	0.132956	0.0490948	GALNT2	Body	opensea
cg11690724	0.132668	0.00626504	EBF1	Body	shelf
cg14579118	0.132566	0.0189045	BLVRA	TSS1500	shore
cg11360546	0.132336	0.0155764	C7orf50	Body	shelf
cg13071869	0.132101	0.0495518	BOC	5'UTR	opensea
cg20029153	0.131975	0.0309957	MYO18A	5'UTR	shore
cg13695746	0.131583	0.0167586	CCDC3	Body	opensea
cg04684014	0.131498	0.0287695	THADA	Body	opensea
cg25672027	0.131472	0.0248807	TSPO	Body	opensea
cg21461745	0.131442	0.036588	SLC39A11	Body	opensea
cg01955533	0.131197	0.0460696	CDKN1A	5'UTR	shore
cg22161893	0.130727	0.0442803	COL11A2	Body	opensea
cg07347205	0.130561	0.0255667		IGR	opensea
cg11392550	0.130481	0.0319108	PRDM16	Body	shore
cg25695992	0.13007	0.0167586		IGR	opensea
cg10460643	0.12997	0.045126	PRKCD	5'UTR	opensea
cg24350475	0.129648	0.0449559	KIAA1462	Body	opensea
cg23756265	0.129446	0.0429498		IGR	opensea
cg10030162	0.129024	0.0263312	ZNF423	Body	opensea
cg05609656	0.129018	0.0351039	DAAM2	5'UTR	opensea
cg12552104	0.128915	0.0492217	CREB5	Body	opensea
cg22079102	0.128644	0.0274436	KDM4B	Body	island
cg05000339	0.127496	0.0447195	RAB11FIP4	Body	shore
cg26504422	0.127407	0.0330845	KCNN4	Body	shore
cg10362842	0.127311	0.0142549	FGFR2	TSS200	shelf
cg12061370	0.127236	0.0485431	COL11A2	Body	opensea
cg27651238	0.127143	0.0302297		IGR	island
cg22992279	0.127005	0.00625381	RBPJ	Body	opensea
cg10296867	0.126776	0.00861357	GAS7	Body	opensea
cg18064917	0.126599	0.0286094		IGR	opensea
cg11795921	0.126571	0.045126	GALNT2	Body	opensea
cg00510149	0.126116	0.0061873	MRVI1	5'UTR	opensea
cg01288337	0.125844	0.0474662	RIN3	Body	opensea
cg09537568	0.125472	0.0408412	WDFY3	Body	opensea
cg20073893	0.12535	0.0122361		IGR	opensea
cg15466933	0.12523	0.0298485	PITPNM2	Body	opensea
cg04239863	0.124956	0.0274436		IGR	opensea
cg12284836	0.124953	0.0342209	ANLN	Body	opensea
cg12410310	0.124691	0.0394641	LGALS12	1stExon	opensea
cg14983936	0.124642	0.0214352	KCNH7	3'UTR	opensea
cg24529237	0.124493	0.0374576		IGR	opensea
cg21342636	0.124435	0.0384015	TNXB	Body	island
cg01294253	0.124431	0.031368	BRD3	Body	shore
cg14207539	0.124429	0.0167586	C10orf11	Body	opensea
cg23210521	0.124413	0.013556	BMPR1B	5'UTR	shore
cg01942372	0.124245	0.00988451	LIMS1	TSS1500	opensea
cg01146501	0.124146	0.0468289	STARD4	TSS1500	shore
cg23288563	0.124107	0.00762028	NDRG2	Body	shore
cg08211704	0.124061	0.0086102		IGR	opensea
cg24161018	0.124044	0.0189045	PLXNA4	Body	opensea
cg03656099	0.123763	0.0233624	TBX2	Body	island
cg26322749	0.123751	0.0267056	COL11A2	Body	opensea
cg10096948	0.123609	0.0245048	TPPP3	TSS1500	island
cg13008631	0.123592	0.0315834	IRS1	1stExon	island
cg09720012	0.123349	0.0103452	PAPSS1	Body	shelf
cg01243072	0.123007	0.0189045		IGR	island
cg24661184	0.122735	0.0407264	TNS3	Body	opensea
cg17117243	0.122674	0.0388323	SESN1	Body	opensea
cg11706790	0.122567	0.0413222	NEU4	TSS200	opensea
cg10716612	0.122313	0.0351039	WWC2	Body	opensea
cg11423998	0.1221	0.0135837	DIP2C	Body	shore
cg16660312	0.121751	0.0219565	NEU4	TSS200	opensea
cg24368226	0.121647	0.0394538	ADAMTS17	Body	opensea
cg07857469	0.1216	0.0315834	PRDM8	5'UTR	shore
cg10888461	0.121424	0.010022	ALPK1	Body	shore
cg26667735	0.121368	0.00861357	FAAH	Body	shelf
cg20597127	0.121348	0.0398341		IGR	shore
cg07580867	0.121242	0.045126	LOC283050	Body	shelf
cg00834923	0.12124	0.0152258		IGR	shore
cg06005199	0.120907	0.0331913	C4orf23	Body	opensea
cg25560443	0.120869	0.0247097	KLHL29	5'UTR	opensea
cg14605150	0.120563	0.0420961	GREM1	5'UTR	shore
cg25460340	0.120459	0.0206528	TMPRSS5	TSS200	opensea
cg05261299	0.120437	0.047542		IGR	opensea
cg20625138	0.12016	0.0485596	UTS2	TSS1500	opensea
cg04129548	0.120084	0.0435665	IRS1	1stExon	island
cg00522048	0.120018	0.0122361	GRK5	Body	opensea
cg05753629	0.119985	0.0206528		IGR	shore
cg21789545	0.119738	0.0179506	COL9A1	Body	opensea
cg19747659	0.119724	0.0126314		IGR	opensea
cg26254045	0.119712	0.00288085	SPRED3	Body	shore
cg07712478	0.119634	0.0387424	RGMA	Body	shore
cg16627285	0.119557	0.0338774	SGCA	TSS200	opensea
cg23987137	0.119237	0.0186841	PDE4D	Body	opensea
cg17802216	0.119212	0.0255667	SMOC2	Body	opensea
cg00730780	0.119023	0.0474616	KIAA1462	Body	opensea
cg13791971	0.118925	0.0404141	FANCC	Body	opensea
cg19728382	0.118819	0.0370548	STC2	TSS1500	shore
cg13654836	0.11879	0.0469397	MSI2	Body	opensea
cg02987635	0.118743	0.0444417	C10orf11	Body	opensea
cg21283680	0.118718	0.00862159	SH3BP5	TSS1500	opensea
cg18345406	0.118592	0.0432303	FAM160A1	5'UTR	opensea
cg18330047	0.118543	0.0167586	TNXB	Body	island
cg15393022	0.118252	0.04418	SSBP3	Body	opensea
cg20957370	0.118216	0.0325938		IGR	opensea
cg00812557	0.118191	0.0241141	TBC1D1	Body	opensea
cg09595050	0.118149	0.0444417	PRDM8	5'UTR	island
cg14523804	0.117917	0.011044		IGR	opensea
cg22653878	0.117783	0.00296294		IGR	opensea
cg12392126	0.1176	0.0154352	BCL2L14	Body	opensea
cg16312496	0.117432	0.0225366		IGR	shore
cg04956511	0.117431	0.0461338	PTPN6	Body	shelf
cg07746514	0.117133	0.0186481	MLEC	3'UTR	opensea
cg12407791	0.116928	0.0142549	UNC13D	Body	opensea
cg15181151	0.116673	0.0490948	PCMT1	TSS1500	shore
cg27315497	0.116355	0.0487759	SLC43A1	Body	shore
cg10703481	0.116335	0.0163002	DNHD1	5'UTR	opensea
cg13019092	0.116316	0.0384015	PDZK1	TSS200	opensea
cg00326251	0.116255	0.0175806	LOXL2	TSS1500	shore
cg19117047	0.116215	0.0401715		IGR	opensea
cg22063654	0.115795	0.0325351		IGR	shelf
cg17969662	0.115711	0.0274436		IGR	opensea
cg10839322	0.115703	0.00982913	HERC2	Body	shore
cg13852730	0.115532	0.00287441		IGR	opensea
cg00085790	0.115422	0.0269343		IGR	opensea
cg05048043	0.115143	0.0468289	LPP	Body	opensea
cg16662785	0.114993	0.0370362	RBM9	Body	opensea
cg26848957	0.114897	0.0313865		IGR	opensea
cg09718347	0.114895	0.0225366	FGD5	3'UTR	opensea
cg20336472	0.11488	0.0211667	FGFR1	Body	opensea
cg13425135	0.11486	0.046938	RXRA	3'UTR	shore
cg27470087	0.114571	0.0191135	RPS6KA4	Body	shore
cg19075717	0.114316	0.03654	CACNA1G	Body	opensea
cg18231690	0.114314	0.0331913	ZNF592	5'UTR	shelf
cg09695851	0.114296	0.0208301		IGR	island
cg15818109	0.114193	0.0238297	COL11A2	Body	opensea
cg20784207	0.114082	0.0191135	ARHGAP24	Body	opensea
cg23532322	0.114062	0.0267956	BAIAP2	3'UTR	shore
cg14256511	0.11405	0.0163002		IGR	shelf
cg14434601	0.113981	0.00395527		IGR	opensea
cg02279883	0.113936	0.0139024	TANC2	TSS1500	opensea
cg21538208	0.1139	0.0179506	MSX1	Body	island
cg21392435	0.113302	0.0404334		IGR	opensea
cg09110502	0.113058	0.0325719	STK24	Body	opensea
cg13104274	0.112659	0.0454765	ATP1B1	Body	shore
cg10376763	0.112584	0.046938	TNP1	3'UTR	opensea
cg18969798	0.112549	0.0240173	DCLK2	Body	opensea
cg19865916	0.112506	0.0319987	NCDN	Body	shelf
cg08773226	0.112498	0.0176784		IGR	opensea
cg09624807	0.112352	0.0315834	NLRC5	Body	opensea
cg21032266	0.112335	0.0324957	C14orf43	Body	shore
cg00219282	0.112113	0.0254782	FNDC1	Body	island
cg00866541	0.111959	0.0453804		IGR	shore
cg02522990	0.111951	0.035179		IGR	opensea
cg12051116	0.111808	0.0125159	CLASP1	Body	opensea
cg25688060	0.111529	0.0285216	BTBD3	5'UTR	shelf
cg08369295	0.111415	0.0455635	LRP5L	TSS1500	shelf
cg14622443	0.111304	0.0325351	43900	TSS1500	shore
cg14582191	0.111226	0.0437341	STK32B	Body	opensea
cg00736958	0.110965	0.0216596	C3orf74	TSS1500	opensea
cg03476007	0.110603	0.0325719	INPP4B	TSS1500	shore
cg24202221	0.110341	0.0231453		IGR	opensea
cg15745284	0.110293	0.0493719	TNXB	Body	island
cg23245485	0.110206	0.0219744	SCNN1A	5'UTR	opensea
cg21385480	0.110125	0.0162461	LRIG1	Body	opensea
cg04485482	0.11005	0.0495518		IGR	opensea
cg12526923	0.109891	0.0384015	ANO8	Body	island
cg22062741	0.109817	0.00730509	ARHGEF10	Body	shelf
cg13734061	0.109804	0.0331913	FGFR2	Body	opensea
cg10523319	0.109555	0.0192083	DHRS3	Body	opensea
cg24006352	0.109163	0.0336667	KCND3	5'UTR	shore
cg23371436	0.108994	0.0358152	NAV2	Body	opensea
cg06591185	0.108987	0.0186841	MIR149	TSS200	island
cg25595834	0.108867	0.0253871		IGR	shore
cg24661274	0.108858	0.0444417	MAP1B	Body	opensea
cg11384744	0.10884	0.0325719	TSPAN13	Body	shore
cg27110054	0.10879	0.0139024	NCALD	TSS1500	shore
cg07591229	0.108674	0.0248807		IGR	island
cg23508908	0.108506	0.028023	MRAP2	Body	opensea
cg00790307	0.108431	0.0320922	SMCR5	TSS1500	shore
cg14288424	0.108146	0.0274967	PRRX2	Body	shore
cg00350432	0.10799	0.0394237	SMAD6	Body	opensea
cg14731044	0.107919	0.00840905	E2F8	Body	shelf
cg00453938	0.107809	0.0276696		IGR	shore
cg02851873	0.107767	0.026242	ZMIZ1	5'UTR	opensea
cg16277843	0.10746	0.00719532		IGR	opensea
cg01465102	0.107356	0.0122361	APBB2	Body	opensea
cg22218316	0.1073	0.0489919		IGR	opensea
cg07675656	0.106993	0.0330845	TSC2	Body	island
cg12495731	0.106969	0.0466864	FN3K	Body	shelf
cg19718306	0.106968	0.010022		IGR	shore
cg19458529	0.106936	0.00395527	MAST4	Body	opensea
cg13154413	0.10693	0.0191135	ZFYVE21	Body	shore
cg16353318	0.106922	0.0286094	CMIP	Body	opensea
cg21204870	0.10684	0.047002	PALM2	Body	opensea
cg13400512	0.10679	0.0154352	TNXB	Body	island
cg20427378	0.106747	0.0370362	COL11A2	Body	opensea
cg01358966	0.106704	0.0490948	RRN3P2	Body	opensea
cg25182523	0.106613	0.0310634	FAM129A	TSS1500	shore
cg00842231	0.106339	0.0238297	LOC55908	3'UTR	shore
cg00253379	0.106272	0.0461651		IGR	opensea
cg22421579	0.106206	0.0474616	CCDC149	Body	opensea
cg21221690	0.106179	0.0244427	GPR177	Body	opensea
cg00911794	0.106172	0.0273318	HIC1	3'UTR	island
cg07580479	0.106145	0.0442803	FOXO3	Body	opensea
cg20782724	0.106113	0.0276696	TNS3	5'UTR	opensea
cg06373870	0.105971	0.0269343	PRDM8	TSS1500	shore
cg15579587	0.10597	0.010022	LRRFIP1	TSS1500	island
cg06450976	0.105911	0.0142549		IGR	opensea
cg24192660	0.105872	0.0342694	ANO8	Body	island
cg22138219	0.105652	0.0285216		IGR	opensea
cg04228709	0.10565	0.0274967	TIAM2	Body	shelf
cg20703261	0.105558	0.0324276		IGR	island
cg05473987	0.105518	0.0230891	DAP	Body	opensea
cg14715383	0.105431	0.0325719	NFATC1	Body	island
cg01313363	0.104933	0.0189662	PLXNB1	TSS1500	shore
cg13643060	0.104853	0.046417	SLC25A13	Body	opensea
cg01190276	0.104699	0.0434668	THRB	5'UTR	opensea
cg21800284	0.104685	0.0233108		IGR	shore
cg22442352	0.104642	0.0176784		IGR	opensea
cg14588003	0.104618	0.00996583		IGR	opensea
cg17905091	0.104567	0.0370362	DIP2C	Body	shore
cg18038894	0.104525	0.00840905	ACSF2	Body	shelf
cg18224970	0.104509	0.023842	VPS13B	Body	opensea
cg17730176	0.104246	0.0330845	TIAF1	TSS1500	shelf
cg20294984	0.104232	0.0330845	SLC2A1	Body	opensea
cg06521347	0.104147	0.0339467		IGR	opensea
cg11268280	0.104127	0.0156703		IGR	shelf
cg19619956	0.103766	0.0230891	FAM193B	5'UTR	opensea
cg06240209	0.103634	0.039893	CTBP2	5'UTR	shore
cg23423191	0.103597	0.0398341	STK10	Body	opensea
cg13069815	0.10356	0.0493719	PAWR	Body	opensea
cg06867482	0.103399	0.0461338	FAM38A	Body	shore
cg24720008	0.102963	0.0435665		IGR	shore
cg19987900	0.102818	0.0315834		IGR	opensea
cg16335858	0.102364	0.0418164	GYLTL1B	TSS1500	shore
cg20952652	0.102322	0.0325351	UXS1	Body	opensea
cg04007987	0.102239	0.0148631	TTYH2	Body	opensea
cg22964758	0.102214	0.0236903		IGR	opensea
cg01256987	0.102207	0.0245048	GXYLT1	TSS1500	shore
cg02836764	0.102173	0.0358143	INPP5A	Body	opensea
cg27065717	0.10208	0.0118663		IGR	opensea
cg13767779	0.101931	0.00707217		IGR	shore
cg00551679	0.101931	0.0489498	FOXF1	3'UTR	shore
cg04277574	0.101923	0.0329711	NAV1	Body	opensea
cg21205776	0.10188	0.0418164	COL11A2	Body	opensea
cg25958716	0.10168	0.0347601	HIBCH	Body	opensea
cg21283066	0.101509	0.013766		IGR	opensea
cg22687766	0.101208	0.0122361		IGR	shelf
cg17453767	0.101019	0.0265169	GAB1	Body	opensea
cg13042288	0.10077	0.0460696	ANPEP	5'UTR	opensea
cg13694876	0.100641	0.0258709	EPHB3	Body	shore
cg22723001	0.100315	0.0351039	KIAA1026	Body	opensea
cg03529261	0.10029	0.040845		IGR	opensea
cg21544658	0.100212	0.0219179	SYT8	TSS200	opensea
cg16302916	0.10007	0.0211667		IGR	opensea
cg24101009	-0.10024	0.0406033	PANX1	Body	shore
cg06480353	-0.10031	0.0209851		IGR	opensea
cg25250013	-0.100819	0.047542	KANK2	Body	shore
cg22920873	-0.100868	0.000799312	C7orf55	TSS1500	island
cg10275917	-0.100884	0.048197	COL28A1	Body	opensea
cg05871756	-0.100943	0.043692		IGR	opensea
cg12341429	-0.101075	0.0185291		IGR	opensea
cg05343739	-0.101271	0.0309957	KCNN3	Body	shore
cg26446832	-0.101954	0.0351039	DKK3	Body	opensea
cg19708986	-0.102032	0.0413222	ARNT2	Body	opensea
cg17467898	-0.102144	0.022706	NUDT1	Body	opensea
cg09175485	-0.102193	0.0282169	KDM2A	Body	shelf
cg02959112	-0.10221	0.030551	NBL1	Body	opensea
cg15867307	-0.102262	0.0351039		IGR	opensea
cg02375208	-0.102318	0.0488734	LHFPL2	Body	shore
cg18973247	-0.102503	0.0325719	ARID1A	Body	opensea
cg04275881	-0.102688	0.0352905	SLAMF8	TSS200	opensea
cg09800500	-0.102744	0.0230891	BCAT1	Body	opensea
cg01686739	-0.102783	0.0440289	BTBD11	Body	opensea
cg03055021	-0.102918	0.0163002	FHAD1	Body	opensea
cg02219601	-0.103097	0.0362749		IGR	shelf
cg16227703	-0.103401	0.0331913	UTP11L	TSS200	island
cg07168060	-0.103546	0.00596713	SH3PXD2A	Body	opensea
cg00718470	-0.103608	0.0126324		IGR	island
cg02861056	-0.103761	0.0370362	PLEK	1stExon	opensea
cg04143120	-0.103853	0.0325719		IGR	opensea
cg11481582	-0.104182	0.0394538		IGR	shore
cg23695131	-0.104325	0.017282		IGR	opensea
cg26184501	-0.104349	0.0176514	ITGA3	Body	opensea
cg09115713	-0.104502	0.0422843	FAM38A	Body	opensea
cg23217940	-0.104625	0.0277798	CYFIP1	Body	opensea
cg05973398	-0.104771	0.0176784	RUNX1	Body	opensea
cg27638057	-0.105048	0.0226086	C18orf45	Body	opensea
cg14378231	-0.105203	0.0485352		IGR	opensea
cg03221073	-0.105284	0.0331913	HMCN1	Body	opensea
cg07979348	-0.105336	0.0152258		IGR	shelf
cg10888811	-0.10557	0.0116836	DTYMK	Body	shelf
cg13060970	-0.10586	0.0428692	PLEK	1stExon	opensea
cg07145664	-0.105868	0.0213974		IGR	opensea
cg00418071	-0.105991	0.00296294		IGR	opensea
cg09654261	-0.106025	0.0185291		IGR	opensea
cg18880986	-0.106257	0.0122361	FBXL18	Body	shore
cg07866909	-0.106331	0.0263312		IGR	opensea
cg22074858	-0.106446	0.030723	GBP3	1stExon	opensea
cg19009471	-0.106614	0.0400141		IGR	island
cg03567939	-0.106751	0.0306653	PRKAG2	5'UTR	opensea
cg20427318	-0.106768	0.0475098		IGR	opensea
cg03466587	-0.106801	0.0348184		IGR	opensea
cg00359661	-0.106967	0.0241141	BMP6	TSS1500	shore
cg18810022	-0.107003	0.0359225		IGR	opensea
cg05673882	-0.107098	0.0245048	POLK	Body	opensea
cg17411016	-0.10722	0.0460696		IGR	opensea
cg01154966	-0.107274	0.000931086	TRPC4AP	TSS1500	island
cg09057412	-0.107663	0.0100648	TULP4	Body	opensea
cg02767093	-0.107684	0.0109535	STK24	Body	shelf
cg02395396	-0.107784	0.019002	RAB3B	Body	opensea
cg26123824	-0.107923	0.018853		IGR	opensea
cg20405742	-0.108154	0.0189045		IGR	opensea
cg27179693	-0.108305	0.0377396	GRIK4	TSS1500	opensea
cg17475467	-0.108628	0.0226086	DHCR24	3'UTR	opensea
cg09564361	-0.108848	0.0323909		IGR	opensea
cg09596336	-0.108959	0.033388	ZEB2	Body	shore
cg24392939	-0.109181	0.0408412		IGR	opensea
cg07086226	-0.109474	0.0274436	MFSD7	Body	island
cg23542902	-0.109521	0.0230891		IGR	opensea
cg03666350	-0.109657	0.0164917		IGR	opensea
cg06191571	-0.109664	0.0440289	RPL21P44	TSS1500	opensea
cg02484352	-0.109904	0.0103452	PDLIM4	Body	opensea
cg04121938	-0.110237	0.0315834		IGR	shore
cg16072777	-0.11037	0.0322456		IGR	opensea
cg06361606	-0.110533	0.0394538		IGR	opensea
cg14585967	-0.111401	0.00828881	44166	5'UTR	opensea
cg11667101	-0.111696	0.0490588	TAF5	TSS200	island
cg00245885	-0.11181	0.0442015	H2AFY	Body	opensea
cg16651768	-0.111889	0.0182607		IGR	opensea
cg16372047	-0.112006	0.04558	NDUFA12	TSS200	island
cg16005145	-0.112032	0.0388323	PSPC1	TSS200	island
cg02933362	-0.112135	0.040845	RFX8	TSS1500	shore
cg27621721	-0.112169	0.0109535		IGR	opensea
cg02224164	-0.112342	0.0186481	MARS	Body	shore
cg07915516	-0.11252	0.0191135	AXIN1	Body	shelf
cg08908131	-0.112522	0.0267956	KIAA1598	Body	opensea
cg16747928	-0.112732	0.00852212		IGR	opensea
cg11760395	-0.112814	0.028023		IGR	opensea
cg24425972	-0.11285	0.00862159	GJB2	5'UTR	shore
cg03388266	-0.112878	0.00407521	TRPM8	Body	opensea
cg14784820	-0.112961	0.0138039	DYSF	Body	shelf
cg25992382	-0.113016	0.0195913	RIN3	Body	opensea
cg11797364	-0.11304	0.0471786		IGR	opensea
cg10435609	-0.113527	0.0491795	MGC27382	Body	opensea
cg00259234	-0.113662	0.0122776		IGR	shore
cg04884025	-0.113726	0.0163002	ZFYVE9	Body	opensea
cg19972648	-0.114326	0.0226086	KCNMA1	Body	opensea
cg21005416	-0.114662	0.00498224	ECE1	TSS1500	opensea
cg18586886	-0.1147	0.0408412	KIAA1949	Body	shore
cg03127349	-0.114746	0.0167586		IGR	opensea
cg03709468	-0.11508	0.0347601	TDO2	Body	opensea
cg03663556	-0.115104	0.028328		IGR	opensea
cg05575505	-0.115131	0.0317048		IGR	opensea
cg25361506	-0.115251	0.0248807		IGR	opensea
cg16235861	-0.115312	0.0142621	TMEM20	TSS200	island
cg24045357	-0.115453	0.0189045		IGR	opensea
cg11554335	-0.115514	0.0394206	UBE2L6	TSS1500	shore
cg00902153	-0.115663	0.0252212	LPP	Body	opensea
cg01505556	-0.115721	0.0171309	TRIM26	5'UTR	opensea
cg16479476	-0.115932	0.0442015		IGR	opensea
cg07736627	-0.116053	0.000931086	ALX4	Body	shelf
cg18049182	-0.116098	0.0325351		IGR	shelf
cg21308365	-0.116601	0.0374576		IGR	opensea
cg16830870	-0.116676	0.0488734	NDUFA12	TSS200	island
cg26187031	-0.116852	0.0389833	DPYSL2	Body	opensea
cg24550933	-0.1169	0.00352611	LOC441897	TSS200	opensea
cg21211882	-0.117019	0.0384015	EPB41L1	Body	opensea
cg22453826	-0.117299	0.00628163		IGR	opensea
cg07484739	-0.11737	0.0253934		IGR	shore
cg24822529	-0.117384	0.0330845		IGR	opensea
cg19072957	-0.117855	0.0394641		IGR	opensea
cg18307978	-0.118006	0.0483591	AQP1	Body	opensea
cg15457481	-0.118222	0.0475319		IGR	opensea
cg09718071	-0.118314	0.00467778		IGR	opensea
cg27050407	-0.118879	0.0492718	FAM65B	Body	opensea
cg14534803	-0.119429	0.0252212	NAV2	Body	opensea
cg05146536	-0.119487	0.0338774		IGR	opensea
cg03254336	-0.119561	0.00442275		IGR	opensea
cg24232510	-0.119594	0.0475319		IGR	opensea
cg15155209	-0.119863	0.0238297	SLC6A6	Body	opensea
cg02026306	-0.120125	0.000253654	PRMT1	Body	island
cg11151251	-0.120557	0.0138039	DCAF5	Body	opensea
cg10177197	-0.120573	0.0484837	DHCR24	3'UTR	opensea
cg06936290	-0.120678	0.0200629		IGR	opensea
cg24680415	-0.120691	0.019113		IGR	opensea
cg04548336	-0.120712	0.0167586	44083	Body	shelf
cg04246167	-0.121154	0.00467778	C3orf67	5'UTR	opensea
cg09051342	-0.121427	0.0167586		IGR	opensea
cg17165848	-0.121706	0.0103452	WIPF1	5'UTR	opensea
cg03849851	-0.122145	0.0296306	RPS6KA2	Body	opensea
cg15587955	-0.12216	0.0138039		IGR	opensea
cg03577157	-0.122216	0.0273667	RNU5E	Body	opensea
cg01812571	-0.122672	0.0253871		IGR	shore
cg27109912	-0.122852	0.0330845		IGR	opensea
cg15732079	-0.123075	0.0096107		IGR	shelf
cg18006637	-0.123092	0.0274436	FAM13A	Body	opensea
cg01282174	-0.123107	0.0189045		IGR	opensea
cg23636802	-0.123786	0.0116836	TNXB	Body	shore
cg10097313	-0.123811	0.0442015		IGR	opensea
cg17738521	-0.124005	0.0464936	HIVEP2	5'UTR	opensea
cg26534847	-0.124031	0.0331008	BPI	TSS200	opensea
cg26647771	-0.125574	0.0101339	NPR3	Body	opensea
cg25224992	-0.126007	0.00278185	ZNF354A	TSS200	island
cg24214260	-0.126605	0.000931086	ZNF551	TSS200	shore
cg23010507	-0.127037	0.00467778		IGR	shelf
cg00287773	-0.127516	0.0265169	C5orf32	Body	opensea
cg16649560	-0.127792	0.0315834	IL4R	5'UTR	opensea
cg04498511	-0.127912	0.00467778	ZC3H11A	5'UTR	shelf
cg06547285	-0.128251	0.0185291	FAM113B	3'UTR	shore
cg15591803	-0.128488	0.0109535	DENND2D	Body	opensea
cg14325112	-0.128563	0.0286863	GLIS3	Body	shelf
cg01878963	-0.128571	0.010504		IGR	opensea
cg19676285	-0.128784	0.0325719	ABLIM2	3'UTR	opensea
cg11756029	-0.128801	0.0219744	TRAFD1	Body	opensea
cg13638282	-0.128841	0.0160476		IGR	shelf
cg25388800	-0.129071	0.0430548		IGR	opensea
cg04499514	-0.129852	0.0207938	C3AR1	TSS200	opensea
cg07135629	-0.129904	0.0295543	AQP1	1stExon	opensea
cg26182406	-0.129955	0.00626504		IGR	shelf
cg23903301	-0.129987	0.0319236	CD59	5'UTR	opensea
cg14986890	-0.130599	0.0296306	RARRES1	Body	opensea
cg19464524	-0.130728	0.0122361	CPEB3	Body	opensea
cg02698668	-0.130901	0.00626504		IGR	shelf
cg08623810	-0.131199	0.0434319	NRXN2	Body	shore
cg05979766	-0.131557	0.0178591		IGR	shelf
cg07817608	-0.131568	0.0442015		IGR	opensea
cg06880930	-0.132364	0.00442275	CPNE2	Body	opensea
cg00278359	-0.132542	0.0116836	KIAA1949	Body	shore
cg07243202	-0.133006	0.0195913		IGR	opensea
cg12127149	-0.133057	0.00373594	DYNC1H1	Body	opensea
cg12534147	-0.133952	0.0384289		IGR	opensea
cg09709565	-0.135191	0.00788525	CREB3L1	Body	shore
cg09093656	-0.135392	0.0442897	TRPV2	Body	opensea
cg25738326	-0.135807	0.0101143		IGR	opensea
cg27661394	-0.136331	0.0244427		IGR	opensea
cg14063191	-0.136338	0.00035054	ZDHHC12	TSS1500	island
cg27492584	-0.136694	0.0101143		IGR	opensea
cg16578085	-0.137192	0.0185291		IGR	opensea
cg03214420	-0.137962	0.010347	C19orf61	5'UTR	shore
cg08698943	-0.138402	0.0191267		IGR	opensea
cg22110158	-0.138706	0.0238546	ST14	Body	opensea
cg24199006	-0.138917	0.0285198	ITPRIP	5'UTR	opensea
cg02849956	-0.139821	0.0325719		IGR	shore
cg05234552	-0.140542	0.0331913		IGR	shore
cg05925497	-0.140649	0.0116836	FLJ32810	Body	opensea
cg01117339	-0.14087	0.0393235		IGR	opensea
cg07254421	-0.14133	0.0309957	SLC1A3	Body	opensea
cg09221159	-0.141395	0.0122361		IGR	opensea
cg03328299	-0.141832	0.00626504	STOML1	Body	shelf
cg11539857	-0.142835	0.0219565		IGR	opensea
cg22021794	-0.143044	0.0238132		IGR	shelf
cg02920600	-0.143274	0.0122361	DGKI	Body	opensea
cg10234693	-0.143403	0.0103452		IGR	shore
cg25765315	-0.143616	0.0444198		IGR	opensea
cg01606773	-0.144053	0.00442275	CD109	Body	opensea
cg15840891	-0.144292	0.0270596		IGR	opensea
cg14488466	-0.144624	0.0155024		IGR	opensea
cg00975624	-0.144633	0.0394237		IGR	opensea
cg19919590	-0.145535	0.00467778	LAPTM5	Body	opensea
cg09244312	-0.147039	0.0219565		IGR	opensea
cg12273284	-0.14706	0.00682056	CAMK1D	Body	opensea
cg22373770	-0.147142	0.0103877		IGR	opensea
cg08216099	-0.147324	0.0179506	PXDN	Body	opensea
cg03821121	-0.14844	0.0356833	MICAL2	5'UTR	opensea
cg17980404	-0.149013	0.0319108	IGFBP4	Body	shore
cg23786580	-0.149106	0.00167374	HECW1	5'UTR	opensea
cg08521995	-0.149947	0.00135152	ANK1	Body	shelf
cg20092122	-0.151503	0.010347	BST2	TSS1500	opensea
cg14205864	-0.153172	0.0242576	PCID2	Body	opensea
cg14062643	-0.153555	0.00840905	PIP5KL1	Body	shore
cg00865429	-0.153763	0.00751012	CLNK	Body	opensea
cg01446731	-0.15582	0.00407521	ARNT2	Body	opensea
cg26118358	-0.156894	0.0352186		IGR	opensea
cg05581878	-0.157964	0.00852212		IGR	opensea
cg01519261	-0.158115	0.0163002	RUNX1	5'UTR	opensea
cg19867579	-0.158305	0.00103016		IGR	opensea
cg07168232	-0.160316	0.00988451	LAMB3	Body	opensea
cg11854227	-0.161038	0.00035054	ILDR1	Body	shore
cg18700744	-0.161665	0.0122361	NAA25	Body	opensea
cg06360604	-0.162919	0.0140774	CAPZB	Body	opensea
cg13030790	-0.163996	0.00278185	RUNX1	5'UTR	opensea
cg22534374	-0.164987	0.0159079		IGR	shelf
cg15812586	-0.16852	0.0274436		IGR	opensea
cg16474118	-0.169998	0.00710855		IGR	opensea
cg02770724	-0.17689	0.000931086	STX1A	Body	shore
cg11229273	-0.177004	0.00407521	ARHGEF3	Body	opensea
cg01510278	-0.182397	0.00861357		IGR	opensea
cg11601932	-0.18745	0.000931086		IGR	opensea
cg09966895	-0.189759	0.00442275	ODZ4	Body	opensea
cg14290576	-0.190683	0.00120152	NFIL3	5'UTR	shore
cg04915566	-0.200283	0.0116836	RUNX1	5'UTR	opensea
cg04362790	-0.206068	0.000641379		IGR	opensea
cg03278514	-0.206537	0.0174421		IGR	opensea
